# Supplementary material for: The Soluble Urokinase-Type Plasminogen Activator Receptor as a Biomarker for Survival and Early Treatment Effect in Metastatic Colorectal Cancer
Source: MDPI journal article supplement (doi:10.3390/cancers13205100), 2021-10-12
Supplement: s1 [file s1]

Supplementary Materials

# The Soluble Urokinase-Type Plasminogen Activator Receptor as a Biomarker for Survival and Early Treatment Effect in Metastatic Colorectal Cancer

Kristian Blomberg, Torben F. Hansen, Claus L. Brasen, Jeppe B. Madsen, Lars H. Jensen and Caroline B. Thomsen

## 1. ROC-curves for death during suPAR study

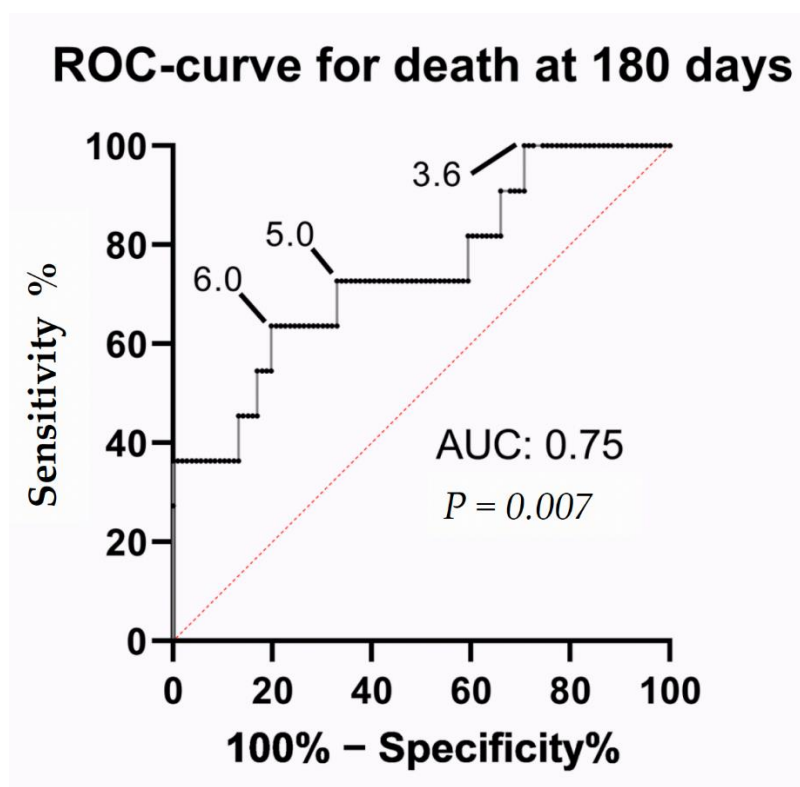

**Figure S1.** Receiver operating characteristics (ROC) curves of death at 180 days. The specific potentially relevant suPAR cut off threshold has been noted on each figure. Area under curve (AUC) = 0.75.

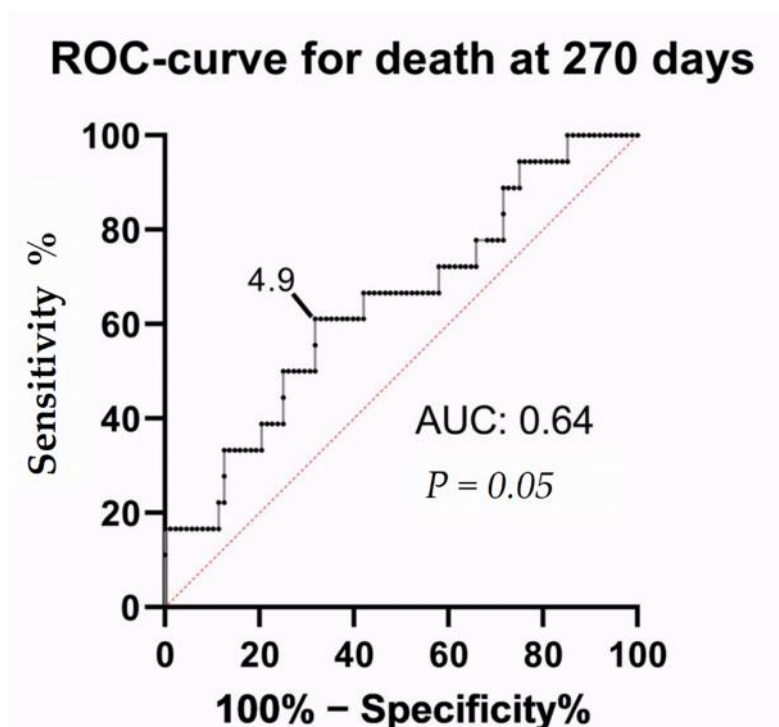

**Figure S2.** Receiver operating characteristics (ROC) curves of death at 270 days. The specific potentially relevant suPAR cut off threshold has been noted on each figure. Area under curve (AUC) = 0.64.

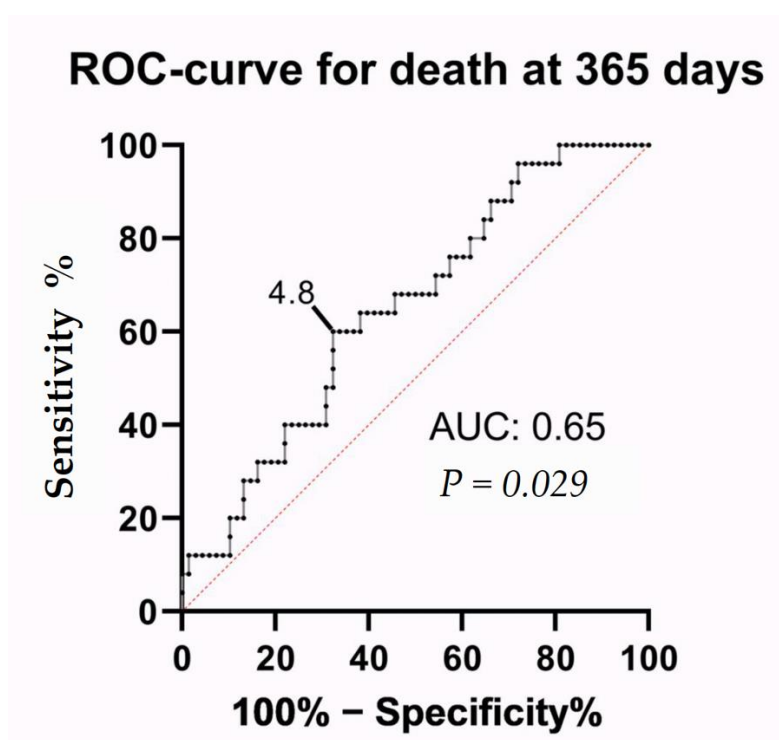

**Figure S3.** Receiver operating characteristics (ROC) curves of death at 365 days. The specific potentially relevant suPAR cut off threshold has been noted on each figure. Area under curve (AUC) = 0.65.

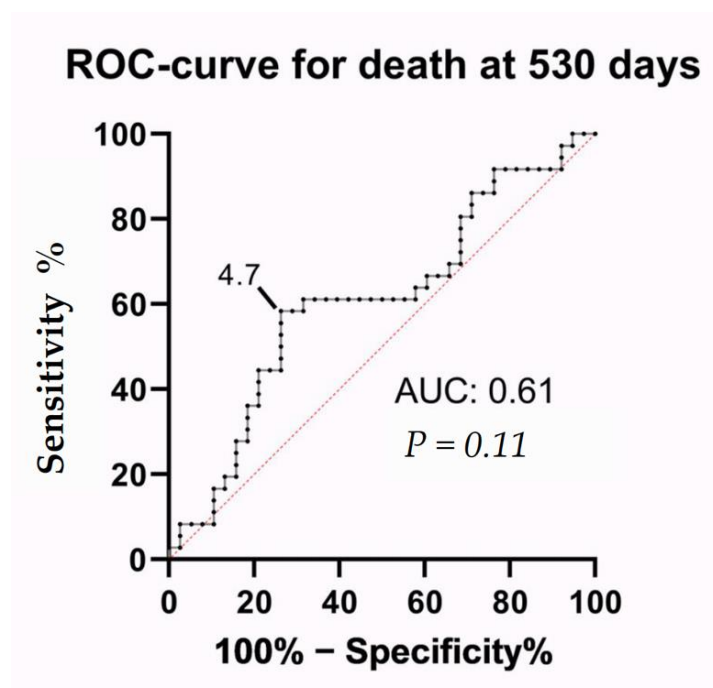

**Figure S4.** Receiver operating characteristics (ROC) curves of death at 530 days. The specific potentially relevant suPAR cut off threshold has been noted on each figure. Area under curve (AUC) = 0.61.

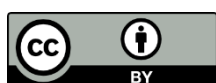

© 2021 by the authors. Licensee MDPI, Basel, Switzerland. This article is an open access article distributed under the terms and conditions of the Creative Commons Attribution (CC BY) license (<http://creativecommons.org/licenses/by/4.0/>).
